# Supplementary material for: Impact of Sarcopenia on Chemotherapy-Triggered Exacerbation of Interstitial Lung Disease in Patients With Non-Small Cell Lung Cancer
Source: Research Square preprint supplement (doi:10.21203/rs.3.rs-658884/v1), 2021-07-01
Supplement: Supplementary file 1 [file edc55b71fcfc3cbfbd58364b.docx]

# Supporting information

**Impact of Sarcopenia on Chemotherapy-triggered Exacerbation of Interstitial Lung Disease in Patients with Non-small Cell Lung Cancer**

Ryota Kikuchi*, Hiroyuki Takoi, Mayuko Ishiwari, Kazutoshi Toriyama, Yuta Kono, Yuki Togashi, Shinji Abe

**Supplementary Figure 1.** Bilateral psoas major muscle (green area) at the third lumber vertebral level


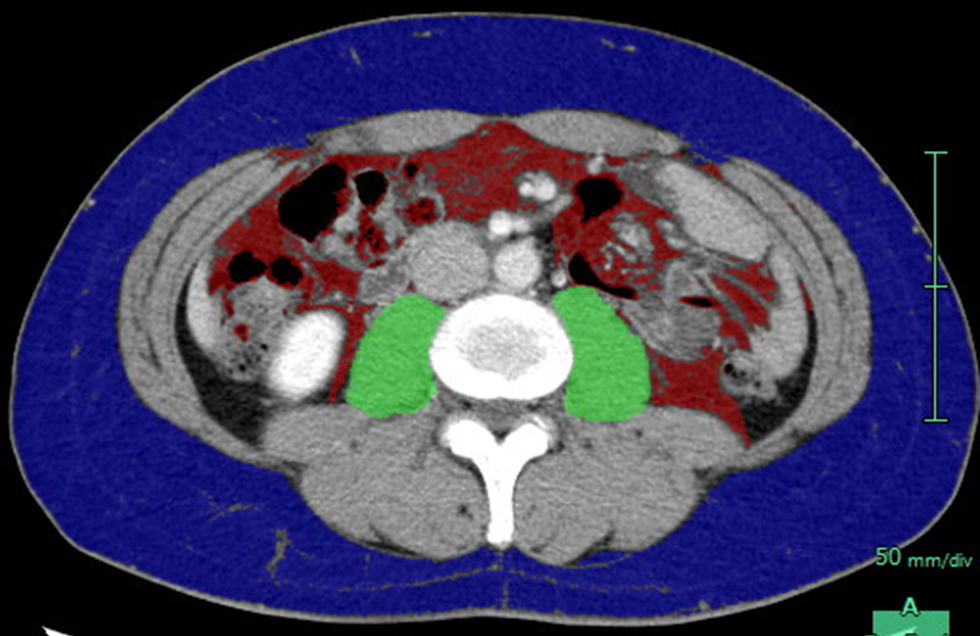


**Supplementary Table S1**. Frequency of chemotherapy regimens during the clinical course

| **First line**  **(n = 74)** | **N** | **Second line**  **(n =46)** | **N** | **Third line**  **(n = 16)** | **N** | **Fourth line**  **(n = 6)** | **N** | **Fifth line**  **(n = 3)** | **N** |
| --- | --- | --- | --- | --- | --- | --- | --- | --- | --- |
| CBDCA + PTX with/without BEV | 39 | DOC | 21 | DOC+RAM | 3 | Nivolumab | 2 | S1 | 1 |
| CDDP/CBDCA + PEM with/without BEV | 18 | PEM | 12 | DOC | 3 | VNR | 1 | Nivolumab | 1 |
| CBDCA + Nab-PTX | 10 | S1 | 5 | Nivolumab | 3 | Nab-PTX | 1 | DOC | 1 |
| CBDCA + S1 | 4 | Pembrolizumab | 3 | PEM | 2 | DOC | 1 |  |  |
| CDDP/CBDCA + VNR | 2 | CBDCA+ETP | 2 | S1 | 2 | S1 | 1 |  |  |
| CDDP + ETP | 1 | Nivolumab | 1 | Nab-PTX | 1 |  |  |  |  |
|  |  | VNR | 1 | VNR | 1 |  |  |  |  |
|  |  | CBDCA+PTX | 1 | Atezolizumab | 1 |  |  |  |  |

N, number; CBDCA, carboplatin; PTX, paclitaxel; BEV, bevacizumab; CDDP, cisplatin; PEM, pemetrexed; Nab-PTX, nanoparticle albumin-bound paclitaxel; VNR, vinorelbine; ETP, etoposide; DOC, docetaxel; RAM, ramucirumab.

**Supplementary Table S2.** Frequency of first line chemotherapy regimens stratified according to sarcopenia status

|  | Number (%) | | *p*-value |
| --- | --- | --- | --- |
|  | No sarcopenia | Sarcopenia |  |
| **Regimens** | 35 | 39 |  |
| CBDCA + PTX  with/without BEV | 18 (51.4%) | 21 (53.8%) | 0.835 |
| CDDP/CBDCA + PEM  with/without BEV | 9 (25.7%) | 9 (23.0%) | 0.792 |
| CBDCA + nab-PTX | 5 (14.7%) | 5 (12.8%) | 0.854 |
| Others | 3 (8.5%) | 4 (10.2%) | 0.805 |

CBDCA, carboplatin; PTX, paclitaxel; BEV, bevacizumab; CDDP, cisplatin; PEM, pemetrexed; Nab-PTX, nanoparticle albumin-bound paclitaxel. Others: CBDCA + S1 (n = 4), CBDCA + vinorelbine (n = 2), CBDCA + etoposide (n = 1).
